# Supplementary material for: An enhanced fluorescent probe through the strategy of using MgWO4 nanosheets to enhance terbium ion luminescence for highly sensitive and point-of-care visual quantitative testing of ciprofloxacin integrated with a low-cost smartphone-based platform
Source: Royal Society of Chemistry journal article supplement (doi:10.1039/d1an01908b), 2021-01-01
Supplement: d1an01908b1.pdf [file d1an01908b1.pdf]

## Supplementary Information

# An enhanced fluorescent probe through the strategy of $\text{MgWO}_4$ nanosheets to enhance terbium ion luminescence for highly sensitive and point-of-care visual quantitative testing of ciprofloxacin integrated with a low-cost smartphone-based platform

Jingfei Zhang, Yu Zhang and Guoyue Shi\*

1 School of Chemistry and Molecular Engineering, Shanghai Key Laboratory for Urban Ecological Processes and Eco-Restoration, East China Normal University, 500 Dongchuan Road, Shanghai 200241, China

\*Authors to whom all correspondence should be addressed

Fax: + 021-54340043; Tel.: + 021-54340043

E-mail: gyshi@chem.ecnu.edu.cn

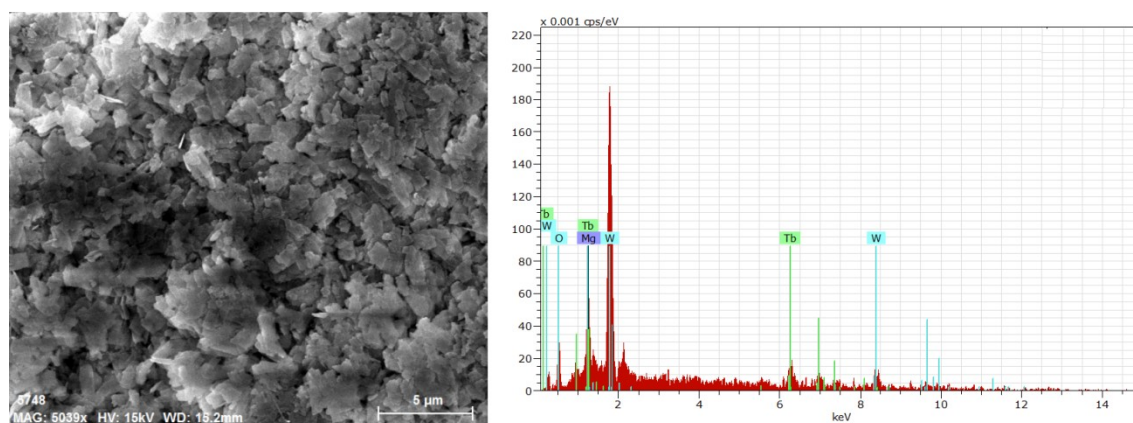

**Figure S1** SEM image of EDS selected area and corresponding EDS spectra of Mg, O, W and Tb of  $\text{Tb}^{3+}$ - $\text{MgWO}_4$  nanosheets

**Table S1** Comparison of our fluorescent probe with the reported fluorescent probe for the detection of CIP.

| Fluorescent material                | Spiked sample                       | Concentration range                                                                               | Detection limit           | Recovery (%)  | RSD (%)     | Refs     |
|-------------------------------------|-------------------------------------|---------------------------------------------------------------------------------------------------|---------------------------|---------------|-------------|----------|
| In(III)-MOFs                        | Tap water                           | 0 nM-300 $\mu$ M                                                                                  | 220 nM                    | none          | none        | [1]      |
| Ad/Tb CPNPs                         | Tablet and urine                    | 60 nM-14 $\mu$ M                                                                                  | 60 nM                     | 99.47~103.4 % | $\leq$ 0.83 | [2]      |
| DNA-AgNCs-Cu <sup>2+</sup>          | Human urine and tablets             | 5 to 100 nM                                                                                       | 1.0 nM                    | 105.5–107.1%  | none        | [3]      |
| CDs/SiDs-BPMA-Cu <sup>2+</sup>      | Injection, tablets, urine and serum | 0.01–150 $\mu$ M                                                                                  | 2.0 nM                    | 95.56~104.53% | 1.43–4.84   | [4]      |
| CdS QDs                             | Water                               | (1.25–8.75) $\times 10^{-4}$ mg mL <sup>-1</sup> (8.75–1200) $\times 10^{-4}$ mg mL <sup>-1</sup> | 7.64 ng mL <sup>-1</sup>  | 95~105 %      | 1.5~2.5     | [5]      |
| MIPs@CdTe/CDs@SiO <sub>2</sub>      | Urine                               | 10~ 60 nM                                                                                         | 0.0127 nM                 | 98.78–102.08% | 0.42~0.96   | [6]      |
| Ln <sup>3+</sup> -MOF               | Water                               | none                                                                                              | 43.91 ng mL <sup>-1</sup> | none          | none        | [7]      |
| Tb <sup>3+</sup> -MgWO <sub>4</sub> | Tap water and mouse serum           | 10 nM -20 $\mu$ M                                                                                 | 2 nM                      | 97-102.2%     | 1.35-5.53   | Our work |

## References

1. W.-B. Zhong, R.-X. Li, J. Lv, T. He, M.-M. Xu, B. Wang, L.-H. Xie and J.-R. Li, *Inorg. Chem. Front.*, 2020, **7**, 1161-1171.
2. H. Tan, L. Zhang, C. Ma, Y. Song, F. Xu, S. Chen and L. Wang, *ACS Appl. Mater. Inter.*, 2013, **5**, 11791-11796.
3. H. R. Wang, X. Yan, J. Sun, X. Wang, X.-E. Zhao, W. Liu and S. Zhu, *Anal. Methods*, 2018, **10**, 4183-4188.

4. Z. Chen, S. Qian, J. Chen, J. Cai, S. Wu and Z. Cai, *Talanta*, 2012, **94**, 240-245.
5. D. Li, Z.-Y. Yan and W.-Q. Cheng, *Spectrochim. Acta. A*, 2008, **71**, 1204-1211.
6. X. Liu, T. Wang, Y. Lu, W. Wang, Z. Zhou and Y. Yan, *Sensor Actuat. B-Chem.*, 2019, **289**, 242-251.
7. T.-Y. Liu, X.-L. Qu and B. Yan, *Dalton Trans.*, 2019, **48**, 17945-17952.
